# Supplementary material for: NADH accumulation during DPAO denitrification in a simultaneous nitrification, denitrification and phosphorus removal system
Source: Royal Society of Chemistry journal article supplement (doi:10.1039/d1ew00198a), 2021-01-01
Supplement: d1ew00198a1.pdf [file d1ew00198a1.pdf]

## Supplementary Materials

### NADH accumulation on DPAO denitrification performance in simultaneous nitrification denitrification and phosphorus removal system

*Jianqiang Zhao*<sup>a,b</sup>, *Shuting Xie*<sup>a,b</sup>, *Yihan Luo*<sup>a,b</sup>, *Xiaoling Li*<sup>c\*</sup>

<sup>a</sup> *School of water and environment, Chang' an University, Xi'an 710064, Shaanxi, China*

<sup>b</sup> *Key Laboratory of Subsurface Hydrology and Ecological Effect in Arid Region of Ministry of Education, Xi'an 710064, Shaanxi, China*

<sup>c</sup> *School of Civil Engineering, Chang' an University, Xi'an 710064, Shaanxi, China*\*Corresponding author: *Xiaoling Li, E-mail address: [lixiaoling20030327@126.com](mailto:lixiaoling20030327@126.com)*

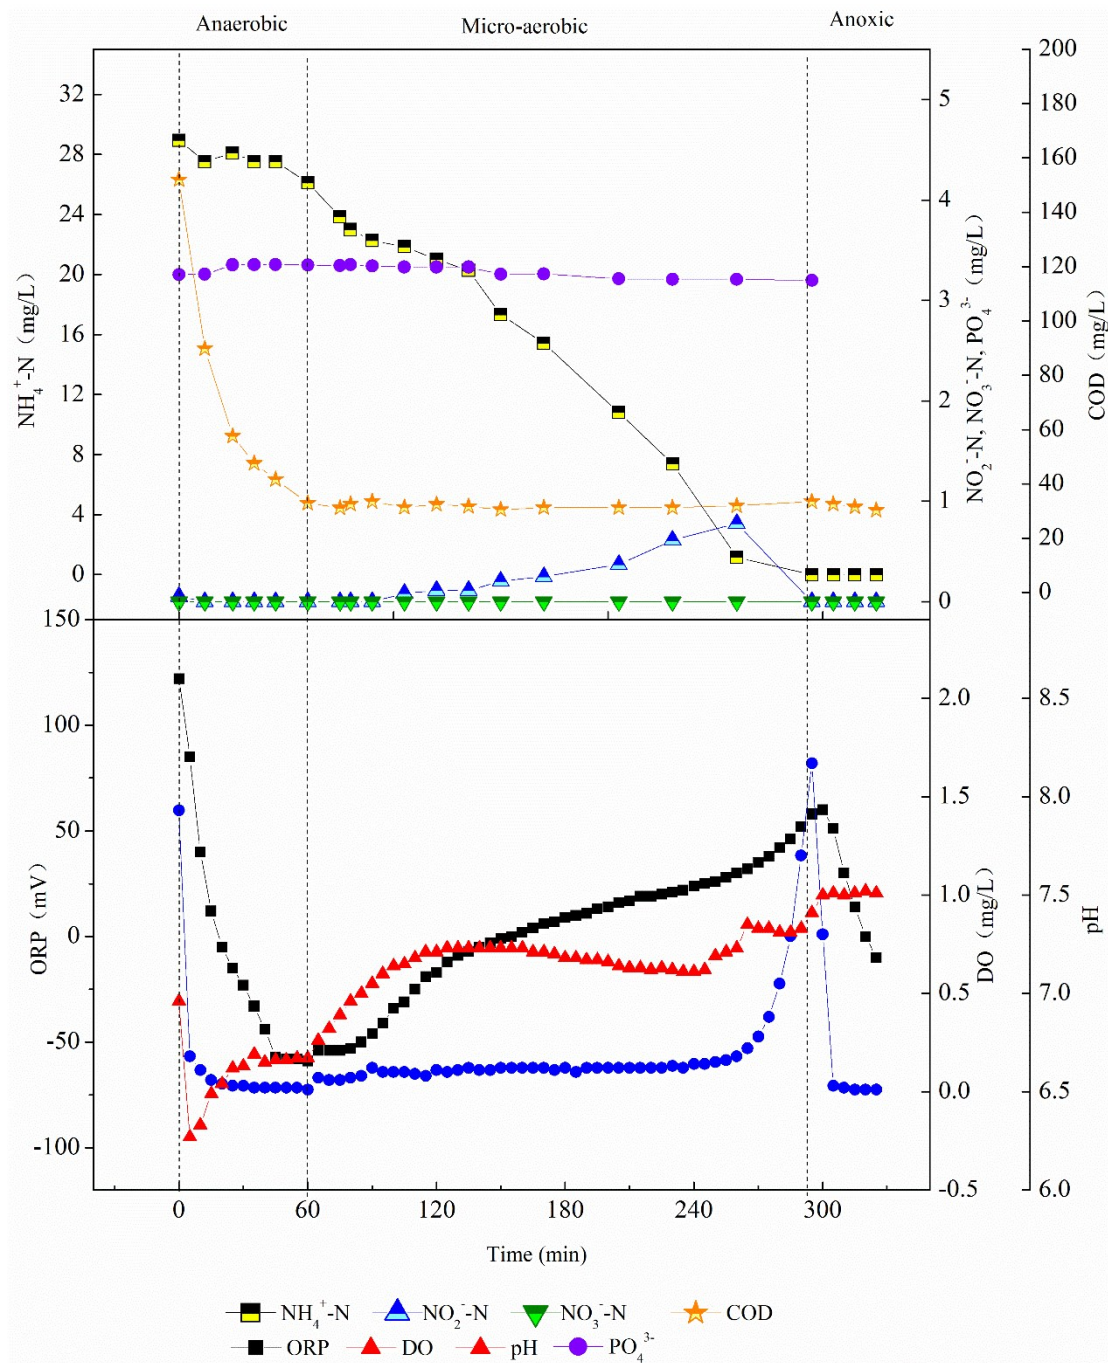

**Figure S1 Profiles of COD, nitrogen, phosphorus, DO, pH, and ORP in the the GAOs dominated SND system under a typical cycle**

## **Determination of NO and N<sub>2</sub>O concentrations**

### **Preparation of Standard curves of NO and N<sub>2</sub>O**

(1) Blow nitrogen at a rate of 5 L/min for more than 5 min to drive out 99.99% of NO/N<sub>2</sub>O in the water and make the solution of zero calibration for use.

(2) Aerate NO/N<sub>2</sub>O into pure water, and inflate continuously at a rate of 5 L/min for 15-20 min until it reaches saturation (the temperature must be kept constant 30°C during the inflation process, otherwise the saturation solubility will change.), spare. Saturated solubility can be obtained by looking up the table.

(3) Place NO/N<sub>2</sub>O microelectrode in the solution of zero calibration and read after the signal is stable.

(4) Take a certain volume of NO/N<sub>2</sub>O saturated solution and put it into a certain volume of nitrogen-filled solution, shake it gently to mix it, then place the microelectrode in the diluent until the signal stabilizes, read the value, and so on.

(5) Plot or use a linear regression to obtain a standard curve.

### **Determination of NO/N<sub>2</sub>O**

The online monitoring system of Danish Unisense microelectrode was used to measure the dissolved NO/N<sub>2</sub>O in SBR, and the data reading interval was 10s. By calculating the slope of the curve, the concentrations of NO/N<sub>2</sub>O can be ascertained according to the standard curve.
